# Supplementary material
Source: MDPI journal article supplement (https://www.mdpi.com/2073-4395/12/8/1973)
Supplement: s1 [file s1]

# Supplementary material

Corresponding article:

Coline C. Jaworski, Eva Thomine, Adrien Rusch, Anne-Violette Lavoie, Chunli Xiu, Di Ning, Yanhui Lu, Su Wang, and Nicolas Desneux (2022). At which spatial scale does crop diversity enhance natural enemy populations and pest control? An experiment in a mosaic cropping system. *Agronomy*.

## Supplementary Figures

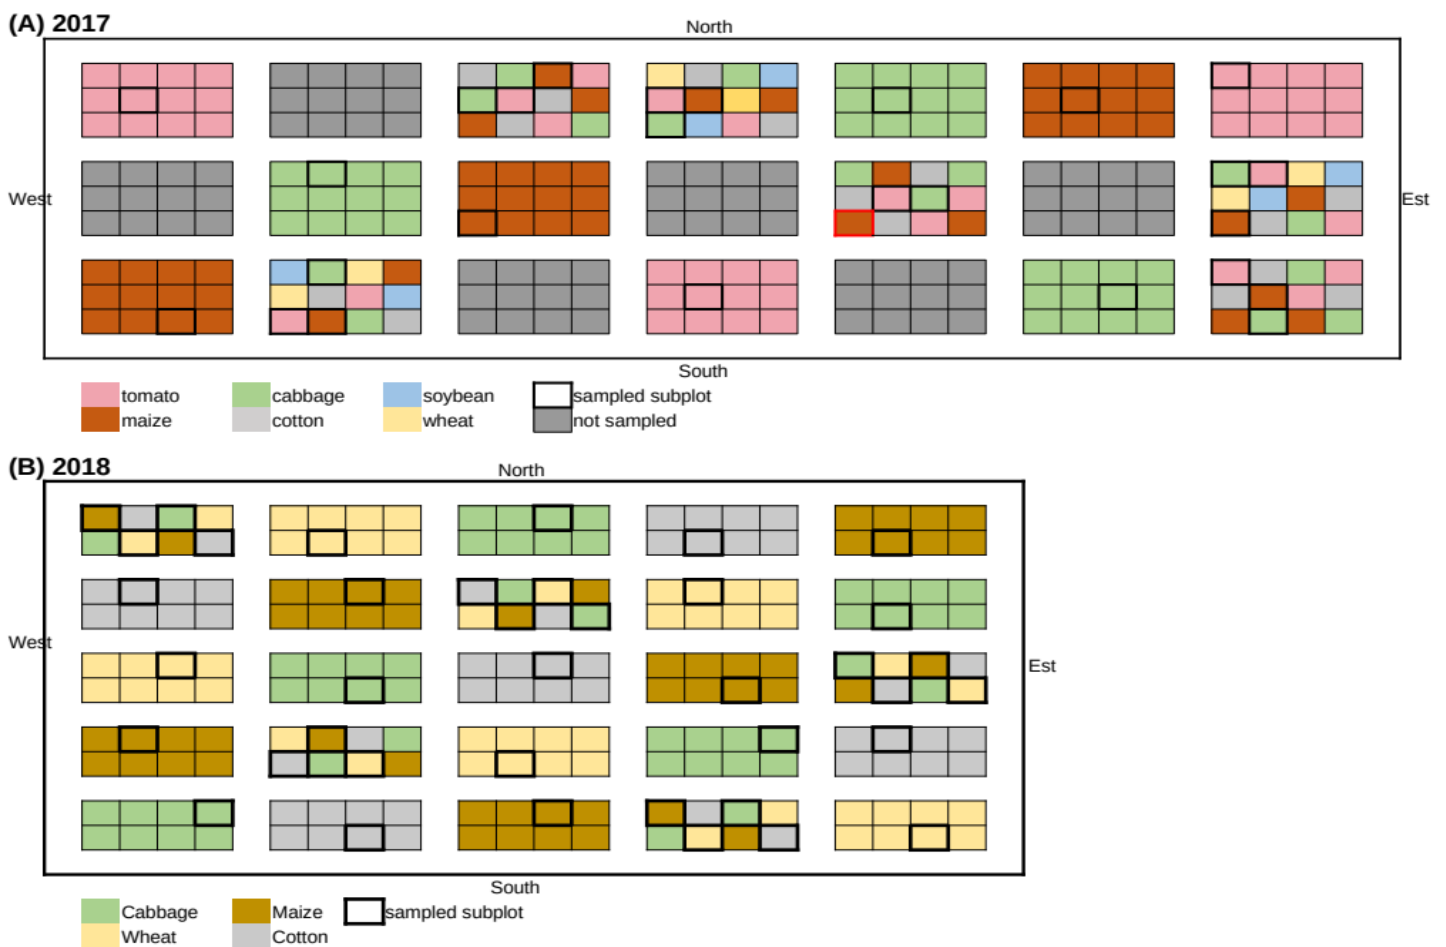

**Figure S1.** Field plans in 2017 (A; N = 3 per treatment and per crop) and in 2018 (B; N = 5 per treatment and per crop). Each plot is divided into 12 subplots in 2017 and eight subplots in 2018, either planted with the same crop or with different crops. Plots are separated by bare soil (shown in white). The sampled sub-plots are shown in black.

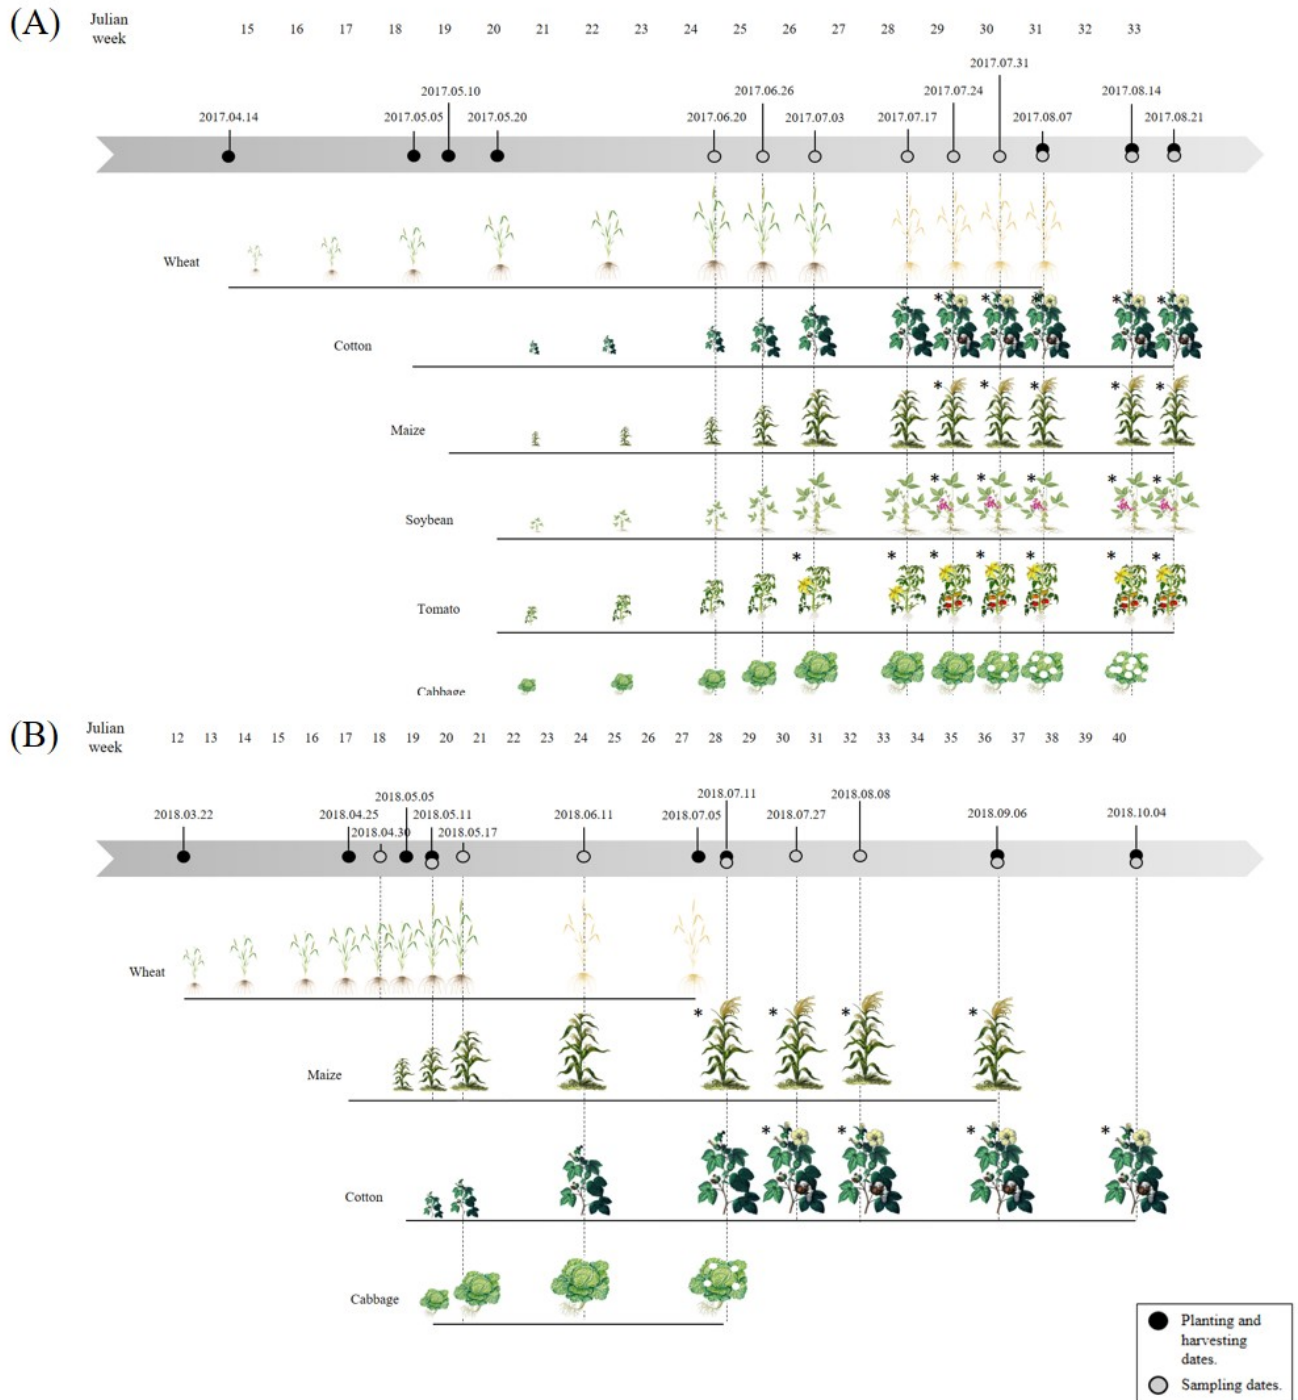

**Figure S2.** Schedule of 2017 (A) and 2018 (B) planting, sampling and harvest of the different crops in the experiments, and associated crop phenology. Dashed lines shows the dates of the sampling dates. The stars show the presence of flower in the different crops.

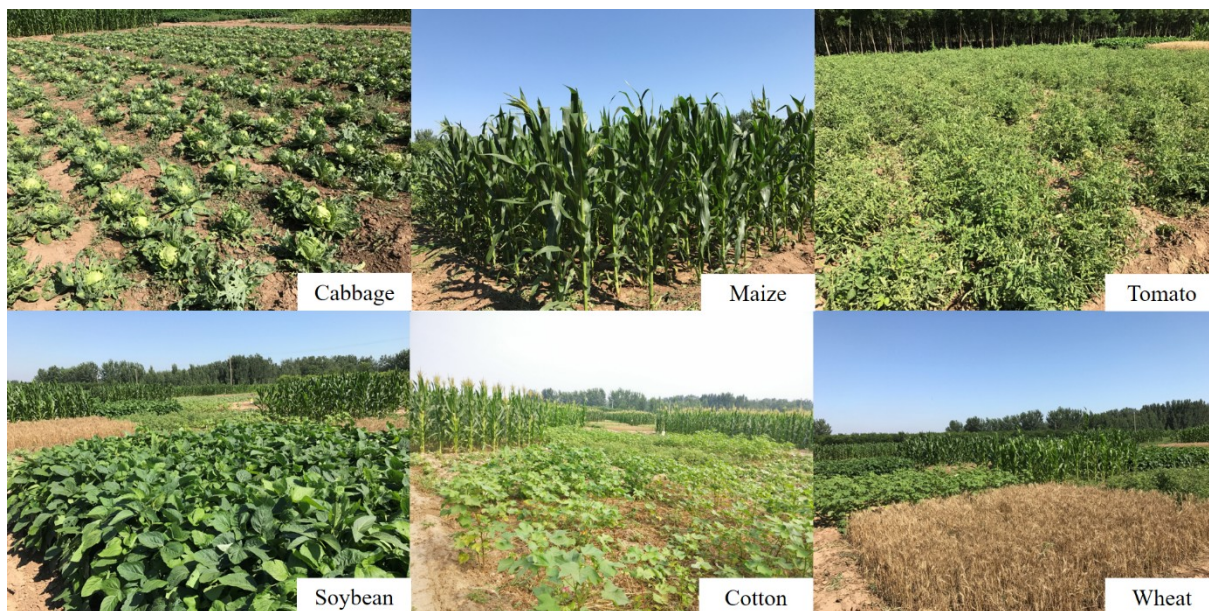

**Figure S3.** Crops grown in the 2017 experiment and apparent canopy density. Here, cabbage, tomato and maize pictures are in a single crop treatment, and soybean, wheat and cotton are in a multi-crop treatment.

## Supplementary Tables

**Table S1.** Number, identity and functional group of arthropod specimens observed and identified in 2017 and 2018. Total numbers analysed for crop diversity effects. Numbers in parentheses are the total numbers collected over the entire sampling season.

|                                                  | 2017       |            |             | 2018               |                    |
|--------------------------------------------------|------------|------------|-------------|--------------------|--------------------|
|                                                  | 1 crop     | 4 crops    | 6 crops     | 1 crop             | 4 crops            |
| <b>Pests</b>                                     |            |            |             |                    |                    |
| <u>Aleurodidae</u>                               |            |            |             |                    |                    |
| <i>Bemisia tabaci</i> Gennadius, 1889            | 194        | 252        | 351         | 131 (1793)         | 105 (1611)         |
| <u>Aphididae</u>                                 |            |            |             |                    |                    |
| <i>Aphis glycines</i> Matsumura, 1917            | <u>186</u> | <u>77</u>  | 111         | <u>626 (961)</u>   | <u>692 (798)</u>   |
| <i>Aphis gossypii</i> Glover, 1877               |            |            |             | 0                  | 0                  |
| <i>Lipaphis erysimi</i> Kaltenbach, 1843         |            |            |             | 228 (349)          | 92 (214)           |
| <i>Metopolophium dirhodum</i> Walker, 1849       |            |            |             | 120                | 204                |
| <i>Myzus persicae</i> Sulzer, 1776               |            |            |             | 10 (21)            | 20 (25)            |
| <i>Rhopalosiphum maidis</i> Fitch, 1856          |            |            |             | 173                | 235                |
| <i>Rhopalosiphum padi</i> , Linnaeus, 1758       |            |            |             | 6 (15)             | 0 (10)             |
| <i>Schizaphis graminum</i> Rondani, 1852         |            |            |             | 45 (117)           | 105 (241)          |
| <i>Sitobion avenae</i> Fabricius, 1794           |            |            |             | 4 (7)              | 1                  |
|                                                  |            |            |             | 40 (149)           | 35 (103)           |
| <u>Chrysomelidae</u>                             |            |            |             |                    |                    |
| <i>Monolepta hieroglyphica</i> Motschulsky, 1858 | 0          | 15         | 7           | 0 (2)              | 4 (6)              |
| <u>Curculionidae</u>                             |            |            |             |                    |                    |
| Curculionidae sp                                 | 0          | 0          | 0           | 0 (4)              | 0 (1)              |
| <u>Lepidoptera</u>                               |            |            |             |                    |                    |
| <i>Ascotis selenaria</i> Hübner, 1825            | <u>168</u> | <u>159</u> | <u>173</u>  | <u>140 (153)</u>   | <u>174 (181)</u>   |
| <i>Conogethes punctiferalis</i> Guenée, 1854     |            |            |             | 1                  | 0                  |
| <i>Helicoverpa armigera</i> Hübner, 1808         |            |            |             | 0 (1)              | 0                  |
| <i>Mythimna separata</i> Walker, 1865            |            |            |             | 0 (3)              | 2 (7)              |
| <i>Ostrinia furnacalis</i> Guenée, 1854          |            |            |             | 2                  | 1                  |
| <i>Pieris rapae</i> Linnaeus, 1758               |            |            |             | 1 (4)              | 0                  |
| <i>Plutella xylostella</i> Linnaeus, 1758        |            |            |             | 95                 | 118                |
| <i>Spodoptera litura</i> Fabricius, 1775         |            |            |             | 33                 | 36                 |
| Other Lepidoptera sp. and eggs                   |            |            |             | 8 (9)              | 6 (7)              |
|                                                  |            |            |             | 0 (5)              | 11 (12)            |
| <u>Hemiptera:Miridae, Pentatomidae</u>           |            |            |             |                    |                    |
| <i>Adelphocoris fasciaticollis</i> Reuter, 1903  | <u>174</u> | <u>317</u> | <u>286</u>  | <u>45 (92)</u>     | <u>50 (94)</u>     |
| <i>Adelphocoris suturalis</i> Jakovlev, 1882     |            |            |             | 1 (5)              | 0 (1)              |
| <i>Apolygus lucorum</i> Meyer-Dür, 1843          |            |            |             | 0 (6)              | 1 (6)              |
| <i>Dolycoris baccarum</i> Linnaeus, 1758         |            |            |             | 18 (29)            | 8 (24)             |
| <i>Erthesina fullo</i> Thunberg, 1783            |            |            |             | 9 (33)             | 14 (31)            |
| <i>Trigonotylus caelestialum</i> Kirkaldy, 1902  |            |            |             | 0                  | 0 (2)              |
| Other Miridae sp. and nymphs                     |            |            |             | 15 (17)            | 6 (9)              |
|                                                  |            |            |             | 2                  | 21                 |
| <u>Thysanoptera</u>                              |            |            |             |                    |                    |
| Thysanoptera sp.                                 |            |            |             | 818 (828)          | 490 (516)          |
| <u>Acarina, Tetranychidae</u>                    |            |            |             |                    |                    |
| <i>Tetranychus cinnabarinus</i> Boisduval, 1867  |            |            |             | 60                 | 0                  |
| <b>Total</b>                                     | <b>784</b> | <b>939</b> | <b>1026</b> | <b>1821 (3901)</b> | <b>1515 (3484)</b> |
| <b>Natural enemies</b>                           |            |            |             |                    |                    |
| <u>Anthocoridae</u>                              |            |            |             |                    |                    |
| <i>Orius</i> sp.                                 | 10         | 7          | 9           | 88 (119)           | 65 (102)           |

|                                                         | 2017       |            |            | 2018             |                  |
|---------------------------------------------------------|------------|------------|------------|------------------|------------------|
|                                                         | 1 crop     | 4 crops    | 6 crops    | 1 crop           | 4 crops          |
| <u>Araneae</u>                                          | <u>153</u> | <u>91</u>  | <u>111</u> | <u>146 (167)</u> | <u>169 (187)</u> |
| Anyphae sp.                                             |            |            |            | 1                | 0 (1)            |
| Dictyni sp.                                             |            |            |            | 1                | 0                |
| Enoplognatha sp.                                        |            |            |            | 1                | 0                |
| <i>Coleosoma octomaculatum</i> Bösenberg & Strand, 1906 |            |            |            | 0 (2)            | 0 (2)            |
| <i>Clubiona</i> sp.                                     |            |            |            | 4 (10)           | 6 (9)            |
| <i>Hylyphantes graminicola</i> Sundevall, 1830          |            |            |            | 24 (28)          | 27 (32)          |
| <i>Misumenops tricuspidatus</i> Simon, 1932             |            |            |            | 1                | 0 (2)            |
| Lycosidae sp.                                           |            |            |            | 1 (7)            | 0 (4)            |
| Neoscona sp.                                            |            |            |            | 1                | 0                |
| Thomisi sp.                                             |            |            |            | 112              | 132              |
| Other spider sp.                                        |            |            |            | 0 (3)            | 4 (5)            |
| <u>Carabidae</u>                                        | <u>16</u>  | <u>36</u>  | <u>22</u>  |                  |                  |
| <i>Chlaenius pallipes</i> Reitter, 1908                 |            |            |            | 5                | 0                |
| <i>Cylindera elisae</i> Motschulsky, 1859               |            |            |            | 0                | 1                |
| <i>Dolichus halensis</i> Schaller, 1783                 |            |            |            | 2 (3)            | 3                |
| Other Carabidae sp.                                     |            |            |            | 0                | 4 (10)           |
| <u>Chrysopidae</u>                                      | <u>3</u>   | <u>4</u>   | <u>2</u>   | <u>61 (142)</u>  | <u>118 (161)</u> |
| <i>Chrysoperla carnea</i> Stephens, 1836                |            |            |            | 5 (10)           | 22 (26)          |
| <i>Chrysoperla nipponensis</i> Okamoto                  |            |            |            | 0 (34)           | 0 (4)            |
| <i>Chrysopa formosa</i> Brauer 1851                     |            |            |            | 55               | 95               |
| <i>Chrysopa pallens</i> Rambur, 1838                    |            |            |            | 1                | 0                |
| <i>Chrysopa phyllochroma</i> Wesmael, 1841              |            |            |            | 0                | 1                |
| <i>Chrysoperla sinica</i> Tiedet                        |            |            |            | 0 (42)           | 0 (35)           |
| Other Chrysopidae sp.                                   |            |            |            |                  |                  |
| <u>Coccinellidae</u>                                    | <u>215</u> | <u>228</u> | <u>318</u> | <u>106 (192)</u> | <u>116 (199)</u> |
| <i>Coccinella septempunctata</i> Linnaeus, 1758         |            |            |            | 1 (14)           | 2 (8)            |
| <i>Harmonia axyridis</i> Pallas, 1773                   |            |            |            | 49 (115)         | 71 (135)         |
| <i>Propylea japonica</i> Thunberg, 1780                 |            |            |            | 55 (62)          | 40 (49)          |
| Other Coccinellidae sp.                                 |            |            |            | 1                | 3 (7)            |
| <u>Aphid parasitoids</u>                                | <u>2</u>   | <u>5</u>   | <u>6</u>   | <u>170 (186)</u> | <u>174 (184)</u> |
| Parasitized aphids                                      |            |            |            | 167 (181)        | 172 (182)        |
| Parasitized eggs                                        |            |            |            | 3                | 2                |
| Other parasitoids                                       |            |            |            | 0 (2)            | 0                |
| <u>Syrphidae</u>                                        | <u>0</u>   | <u>1</u>   | <u>2</u>   | <u>4 (8)</u>     | <u>8 (11)</u>    |
| <i>Episyrphus balteatus</i> De Geer, 1776               |            |            |            | 2                | 4                |
| Other Syrphidae sp.                                     |            |            |            | 2 (6)            | 4 (7)            |
| <b>Total</b>                                            | <b>399</b> | <b>371</b> | <b>470</b> | <b>583 (826)</b> | <b>658 (858)</b> |

**Table S2.** *Post hoc* comparison of means in species richness between crops in 2018.

| Groups           | Estimate $\pm$ SE | <i>P</i>    |
|------------------|-------------------|-------------|
| Cabbage - Cotton | 3.6 $\pm$ 0.51    | < 0.001 *** |
| Cabbage - Maize  | -0.1 $\pm$ 0.51   | 0.99        |
| Cabbage - Wheat  | -0.9 $\pm$ 0.51   | 0.30        |
| Cotton - Maize   | -3.7 $\pm$ 0.51   | < 0.001 *** |
| Cotton - Wheat   | -4.5 $\pm$ 0.51   | < 0.001 *** |
| Maize - Wheat    | -0.8 $\pm$ 0.51   | 0.40        |

\*\*\*:  $P < 0.001$ .
